# Supplementary material
Source: HighWire-hosted journal article supplement (https://www.cmajopen.ca/highwire/filestream/87951/field_highwire_adjunct_files/1/2021-0046-2-at.pdf)
Supplement: 2021-0046-2-at.pdf [file 2021-0046-2-at.pdf]

## Appendix 2: Recruitment

List of agencies/social media/advertisements/professional organizations contacted for recruitment to first and second survey.

Professional organizations:

1. Canadian Association of Nurses in Oncology
2. Canadian Association of Medical Oncologists
3. Canadian Association of Radiation Oncology
4. Canadian Society of Surgical Oncology
5. Canadian Association of Psychosocial Oncology (declined to disseminate information)
6. Canadian Association of Medical Radiation Technologists
7. Canadian Association of General Practitioners in Oncology (declined to disseminate information)

Institutional, patient care organizations, or cancer survivorship groups:

1. Alberta Health Services Cancer Cancer
2. Alberta Health Services Cancer Strategic Clinical Network and Surgical Strategic Clinical network
3. National Enhanced Recovery After Surgery group
4. Canadian Cancer Survivorship Research Consortium
5. Canadian Partnership against cancer
6. Canadian Cancer Trials Group

Patient advocacy organizations:

1. Wellspring Calgary
2. Wellspring Edmonton
3. Wellspring Ontario (Toronto, London, Niagra)
4. Alberta Health Services Patient and Family Advisory group
5. Colorectal Cancer Canada
6. Ostomy association of Winnipeg
7. Ostomy society of Canada
8. Canadian Cancer Survivor Network
9. Carers Canada

Social Media

1. Canadian Cancer Survivorship Research Consortium
2. Patient's for Change
3. Colorectal Cancer Canada
4. Dedicated study website: [colorectalcancerpsp.com](http://colorectalcancerpsp.com)
5. Alberta Health Services
6. Canadian Cancer Survivorship Research Consortium

Miscellaneous:

1. Direct contact with colleagues (e.g. physicians from steering committee contacting physicians in their network), patients directly contacting other patients.
